# Supplementary material for: Female Sex and Living in a Large City Moderate the Relationships between Nursing Students’ Stress Level, Perception of Their Studies, and Intention to Practice Professionally: A Cross-Sectional Study
Source: MDPI journal article supplement (doi:10.3390/ijerph19095740), 2022-05-09
Supplement: s1 [file s1]

## Supplementary Materials

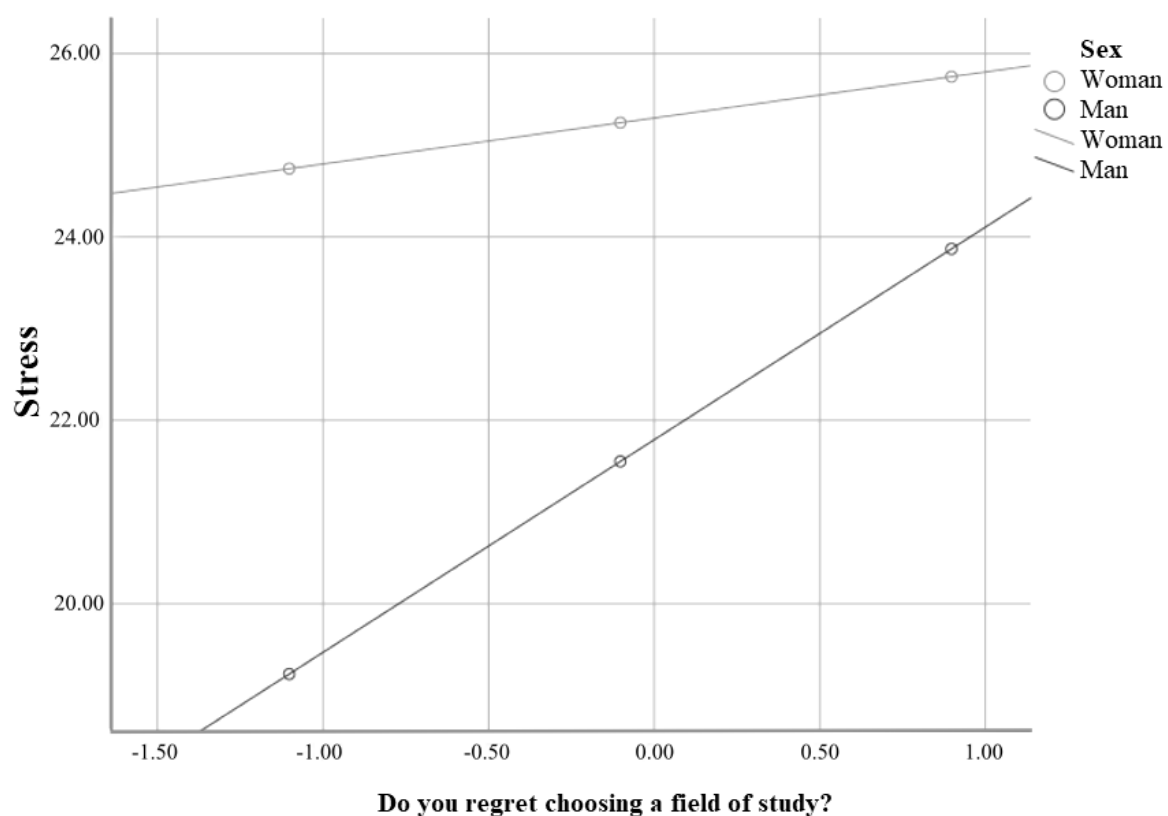

**Figure S1.** Relationship between regretting choice of major and stress level with considering sex.

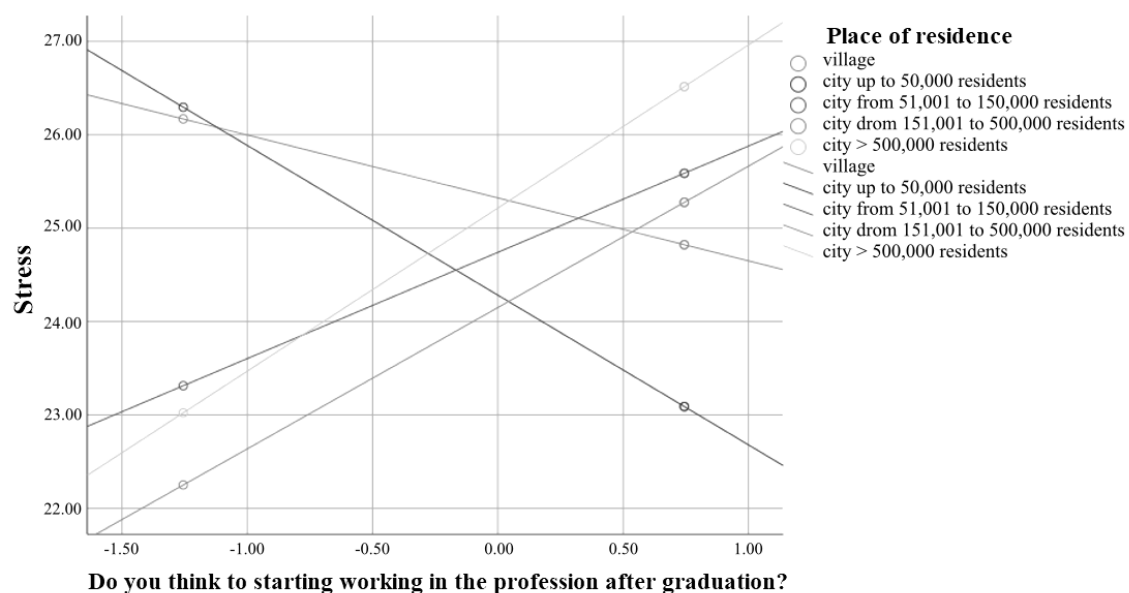

**Figure S2.** The relationship between the decision to pursue a career after graduation and stress levels by place of residence.

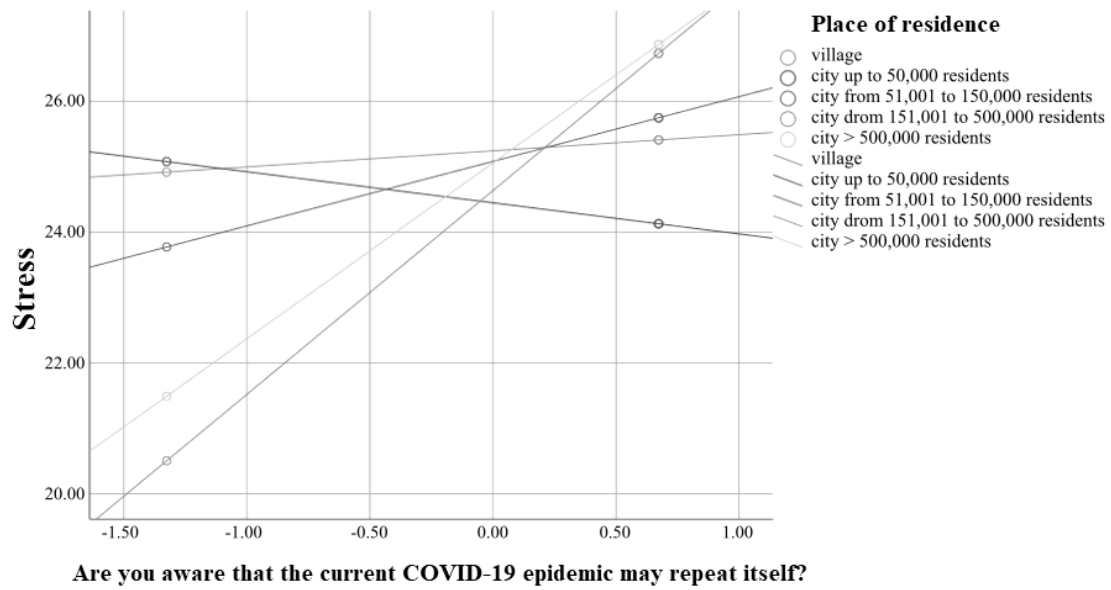

**Figure S3.** The relationship between awareness of the possibility of a repeat of the current pandemic situation and stress levels by place of residence.
